# Supplementary material for: The importance of indirect hotspots when prioritizing research in green chemical synthesis
Source: Royal Society of Chemistry journal article supplement (doi:10.1039/d5gc01085c), 2025-01-01
Supplement: d5gc01085c1.xlsx [file d5gc01085c1.xlsx]

## Sheet: Table 1
A 5-STEP SEQUENCE WITH AN EARLY HOTSPOT
Consider the base case: A five step process where the 2nd step is the hotspot.
The results of the calculations are independent of the initial mass of A, but let's use 100 g of A as a starting point.
Here I'm assuming that the harm in each step is proportional to the mass of SM of that step.
For simplicity, I assume that all chemicals have the same MW.
Step#	1	2	3	4	5	Total
Mass of SM, g	100	60	36	21.6	12.96
Yield, %	0.6	0.6	0.6	0.6	0.6
Mass of product, g	60	36	21.6	12.96	7.776
Harm per g	3	80	8.33333	13.8889	23.1481
Total harm	300	4800	300	300	300	6000
% of total harm	0.05	0.8	0.05	0.05	0.05
Total harm per g						771.605
Now let's revise this scenario and see what happens.
Scenario #1: we'll make step 1 greener
Step#	1	2	3	4	5	Total
Mass of SM, g	100	60	36	21.6	12.96
Yield, %	0.6	0.6	0.6	0.6	0.6
Mass of product, g	60	36	21.6	12.96	7.776
Harm per g	1.5	80	8.33333	13.8889	23.1481
Total harm	150	4800	300	300	300	5850
% of total harm	0.025641	0.820513	0.0512821	0.0512821	0.0512821
Total harm per g						752.315
The total harm/g goes down by:							0.025
Scenario #2: we'll make step 2 greener
Step#	1	2	3	4	5	Total
Mass of SM, g	100	60	36	21.6	12.96
Yield, %	0.6	0.6	0.6	0.6	0.6
Mass of product, g	60	36	21.6	12.96	7.776
Harm per g	3	40	8.33333	13.8889	23.1481
Total harm	300	2400	300	300	300	3600
% of total harm	0.0833333	0.666667	0.0833333	0.0833333	0.0833333
Total harm per g						462.963
The total harm/g goes down by:							0.4
Scenario #3: we'll make step 3 greener
Step#	1	2	3	4	5	Total
Mass of SM, g	100	60	36	21.6	12.96
Yield, %	0.6	0.6	0.6	0.6	0.6
Mass of product, g	60	36	21.6	12.96	7.776
Harm per g	3	80	4.16667	13.8889	23.1481
Total harm	300	4800	150	300	300	5850
% of total harm	0.0512821	0.820513	0.025641	0.0512821	0.0512821
Total harm per g						752.315
The total harm/g goes down by:							0.025
Scenario #4: we'll make step 4 greener
Step#	1	2	3	4	5	Total
Mass of SM, g	100	60	36	21.6	12.96
Yield, %	0.6	0.6	0.6	0.6	0.6
Mass of product, g	60	36	21.6	12.96	7.776
Harm per g	3	80	8.33333	6.94444	23.1481
Total harm	300	4800	300	150	300	5850
% of total harm	0.0512821	0.820513	0.0512821	0.025641	0.0512821
Total harm per g						752.315
The total harm/g goes down by:							0.025
Scenario #5: we'll make step 5 greener
Step#	1	2	3	4	5	Total
Mass of SM, g	100	60	36	21.6	12.96
Yield, %	0.6	0.6	0.6	0.6	0.6
Mass of product, g	60	36	21.6	12.96	7.776
Harm per g	3	80	8.33333	13.8889	11.5741
Total harm	300	4800	300	300	150	5850
% of total harm	0.0512821	0.820513	0.0512821	0.0512821	0.025641
Total harm per g						752.315
The total harm/g goes down by:							0.025
Scenario #6: we'll improve the yield of step 1 without changing the harm
Step#	1	2	3	4	5	Total
Mass of SM, g	100	90	54	32.4	19.44
Yield, %	0.9	0.6	0.6	0.6	0.6
Mass of product, g	90	54	32.4	19.44	11.664
Harm per g	3	80	8.33333	13.8889	23.1481
Total harm	300	7200	450	450	450	8850
% of total harm	0.0338983	0.813559	0.0508475	0.0508475	0.0508475
Total harm per g						758.745
The total harm/g goes down by:							0.0166667
Scenario #7: we'll improve the yield of step 2 without changing the harm
Step#	1	2	3	4	5	Total
Mass of SM, g	100	60	54	32.4	19.44
Yield, %	0.6	0.9	0.6	0.6	0.6
Mass of product, g	60	54	32.4	19.44	11.664
Harm per g	3	80	8.33333	13.8889	23.1481
Total harm	300	4800	450	450	450	6450
% of total harm	0.0465116	0.744186	0.0697674	0.0697674	0.0697674
Total harm per g						552.984
The total harm/g goes down by:							0.283333
Scenario #8: we'll improve the yield of step 3 without changing the harm
Step#	1	2	3	4	5	Total
Mass of SM, g	100	60	36	32.4	19.44
Yield, %	0.6	0.6	0.9	0.6	0.6
Mass of product, g	60	36	32.4	19.44	11.664
Harm per g	3	80	8.33333	13.8889	23.1481
Total harm	300	4800	300	450	450	6300
% of total harm	0.047619	0.761905	0.047619	0.0714286	0.0714286
Total harm per g						540.123
The total harm/g goes down by:							0.3
Scenario #9: we'll improve the yield of step 4 without changing the harm
Step#	1	2	3	4	5	Total
Mass of SM, g	100	60	36	21.6	19.44
Yield, %	0.6	0.6	0.6	0.9	0.6
Mass of product, g	60	36	21.6	19.44	11.664
Harm per g	3	80	8.33333	13.8889	23.1481
Total harm	300	4800	300	300	450	6150
% of total harm	0.0487805	0.780488	0.0487805	0.0487805	0.0731707
Total harm per g						527.263
The total harm/g goes down by:							0.316667
Scenario #10: we'll improve the yield of step 5 without changing the harm
Step#	1	2	3	4	5	Total
Mass of SM, g	100	60	36	21.6	12.96
Yield, %	0.6	0.6	0.6	0.6	0.9
Mass of product, g	60	36	21.6	12.96	11.664
Harm per g	3	80	8.33333	13.8889	23.1481
Total harm	300	4800	300	300	300	6000
% of total harm	0.05	0.8	0.05	0.05	0.05
Total harm per g						514.403
The total harm/g goes down by:							0.333333
Scenario #11: we'll improve the yield of step 4 but in a way that causes 3x more harm
Step#	1	2	3	4	5	Total
Mass of SM, g	100	60	36	21.6	19.44
Yield, %	0.6	0.6	0.6	0.9	0.6
Mass of product, g	60	36	21.6	19.44	11.664
Harm per g	3	80	8.33333	41.6667	23.1481
Total harm	300	4800	300	900	450	6750
% of total harm	0.0444444	0.711111	0.0444444	0.133333	0.0666667
Total harm per g						578.704
The total harm/g goes down by:							0.25
Scenario #12: we'll improve the yields of steps 3,4,5 but in a way that causes 5x more harm
Step#	1	2	3	4	5	Total
Mass of SM, g	100	60	36	32.4	29.16
Yield, %	0.6	0.6	0.9	0.9	0.9
Mass of product, g	60	36	32.4	29.16	26.244
Harm per g	3	80	8.33333	13.8889	23.1481
Total harm	300	4800	300	450	675	6525
% of total harm	0.045977	0.735632	0.045977	0.0689655	0.103448
Total harm per g						248.628
The total harm/g goes down by:							0.677778

## Sheet: Table 2
A CONVERGENT SYNTHESIS
Consider the base case: A convergent synthesis where the frst step of one branch is the hotspot.
The results of the calculations are independent of the initial mass of A, but let's use 100 g of A as a starting point.
Here I'm assuming that the harm in each step is proportional to the mass of SM of that step.
I also assume that the step giving E uses equal masses of B and C.								3	5	8.33333	13.8889	23.1481
For simplicity, I assume that all chemicals have the same MW.
Step#	1	2	3	4	5	6	Total
Mass of SM, g	100	60	100	60	36	21.6
Yield, %	0.6	0.6	0.6	0.6	0.6	0.6
Mass of product, g	60	36	60	36	21.6	12.96
Harm per g	35	5	3	5	8.33333	13.888
Total harm	3500	300	300	300	300	299.981	4999.98
% of total harm	0.700003	0.0600002	0.0600002	0.0600002	0.0600002	0.0599964
Total harm per g							385.801
Now let's revise this scenario and see what happens.
Scenario #1: we'll make step 1 greener
Step#	1	2	3	4	5	6	Total
Mass of SM, g	100	60	100	60	36	21.6
Yield, %	0.6	0.6	0.6	0.6	0.6	0.6
Mass of product, g	60	36	60	36	21.6	12.96
Harm per g	17.5	5	3	5	8.33333	13.888
Total harm	1750	300	300	300	300	299.981	3249.98
% of total harm	0.538465	0.0923082	0.0923082	0.0923082	0.0923082	0.0923023
Total harm per g							250.77
The total harm/g goes down by:								0.350001
Scenario #2: we'll make step 2 greener
Step#	1	2	3	4	5	6	Total
Mass of SM, g	100	60	100	60	36	21.6
Yield, %	0.6	0.6	0.6	0.6	0.6	0.6
Mass of product, g	60	36	60	36	21.6	12.96
Harm per g	35	2.5	3	5	8.33333	13.888
Total harm	3500	150	300	300	300	299.981	4849.98
% of total harm	0.721652	0.030928	0.0618559	0.0618559	0.0618559	0.061852
Total harm per g							374.227
The total harm/g goes down by:								0.0300001
Scenario #3: we'll make step 3 greener
Step#	1	2	3	4	5	6	Total
Mass of SM, g	100	60	100	60	36	21.6
Yield, %	0.6	0.6	0.6	0.6	0.6	0.6
Mass of product, g	60	36	60	36	21.6	12.96
Harm per g	35	5	1.5	5	8.33333	13.888
Total harm	3500	300	150	300	300	299.981	4849.98
% of total harm	0.721652	0.0618559	0.030928	0.0618559	0.0618559	0.061852
Total harm per g							374.227
The total harm/g goes down by:								0.0300001
Scenario #4: we'll make step 4 greener
Step#	1	2	3	4	5	6	Total
Mass of SM, g	100	60	100	60	36	21.6
Yield, %	0.6	0.6	0.6	0.6	0.6	0.6
Mass of product, g	60	36	60	36	21.6	12.96
Harm per g	35	5	3	2.5	8.33333	13.888
Total harm	3500	300	300	150	300	299.981	4849.98
% of total harm	0.721652	0.0618559	0.0618559	0.030928	0.0618559	0.061852
Total harm per g							374.227
The total harm/g goes down by:								0.0300001
Scenario #5: we'll make step 5 greener
Step#	1	2	3	4	5	6	Total
Mass of SM, g	100	60	100	60	36	21.6
Yield, %	0.6	0.6	0.6	0.6	0.6	0.6
Mass of product, g	60	36	60	36	21.6	12.96
Harm per g	35	5	3	5	4.16667	13.888
Total harm	3500	300	300	300	150	299.981	4849.98
% of total harm	0.721652	0.0618559	0.0618559	0.0618559	0.030928	0.061852
Total harm per g							374.227
The total harm/g goes down by:								0.0300001
Scenario #6: we'll make step 6 greener
Step#	1	2	3	4	5	6	Total
Mass of SM, g	100	60	100	60	36	21.6
Yield, %	0.6	0.6	0.6	0.6	0.6	0.6
Mass of product, g	60	36	60	36	21.6	12.96
Harm per g	35	5	3	5	8.33333	6.944
Total harm	3500	300	300	300	300	149.99	4849.99
% of total harm	0.721651	0.0618558	0.0618558	0.0618558	0.0618558	0.0309259
Total harm per g							374.228
The total harm/g goes down by:								0.0299982
Scenario #7: we'll improve the yield of step 1 without changing the harm
Step#	1	2	3	4	5	6	Total
Mass of SM, g	100	90	150	90	54	32.4
Yield, %	0.9	0.6	0.6	0.6	0.6	0.6
Mass of product, g	90	54	90	54	32.4	19.44
Harm per g	35	5	3	5	8.33333	13.888
Total harm	3500	450	450	450	450	449.971	5749.97
% of total harm	0.608699	0.0782613	0.0782613	0.0782613	0.0782613	0.0782563
Total harm per g							295.78
The total harm/g goes down by:								0.233334
Scenario #8: we'll improve the yield of step 2 without changing the harm
Step#	1	2	3	4	5	6	Total
Mass of SM, g	100	60	150	90	54	32.4
Yield, %	0.6	0.9	0.6	0.6	0.6	0.6
Mass of product, g	60	54	90	54	32.4	19.44
Harm per g	35	5	3	5	8.33333	13.888
Total harm	3500	300	450	450	450	449.971	5599.97
% of total harm	0.625003	0.0535717	0.0803576	0.0803576	0.0803576	0.0803524
Total harm per g							288.064
The total harm/g goes down by:								0.253334
Scenario #9: we'll improve the yield of step 3 without changing the harm
Step#	1	2	3	4	5	6	Total
Mass of SM, g	100	60	66.666	59.9994	36	21.6
Yield, %	0.6	0.6	0.9	0.6	0.6	0.6
Mass of product, g	60	36	59.9994	35.9996	21.6	12.96
Harm per g	35	5	3	5	8.33333	13.888
Total harm	3500	300	199.998	299.997	300	299.981	4899.98
% of total harm	0.714289	0.0612248	0.0408161	0.0612242	0.0612248	0.0612209
Total harm per g							378.085
The total harm/g goes down by:								0.0200011
Scenario #10: we'll improve the yield of step 4 without changing the harm
Step#	1	2	3	4	5	6	Total
Mass of SM, g	100	60	66.6667	40	36	21.6
Yield, %	0.6	0.6	0.6	0.9	0.6	0.6
Mass of product, g	60	36	40	36	21.6	12.96
Harm per g	35	5	3	5	8.33333	13.888
Total harm	3500	300	200	200	300	299.981	4799.98
% of total harm	0.72917	0.0625002	0.0416669	0.0416669	0.0625002	0.0624962
Total harm per g							370.369
The total harm/g goes down by:								0.0400001
Scenario #11: we'll improve the yield of step 5 without changing the harm
Step#	1	2	3	4	5	6	Total
Mass of SM, g	100	60	100	60	36	32.4
Yield, %	0.6	0.6	0.6	0.6	0.9	0.6
Mass of product, g	60	36	60	36	32.4	19.44
Harm per g	35	5	3	5	8.33333	13.888
Total harm	3500	300	300	300	300	449.971	5149.97
% of total harm	0.679615	0.0582528	0.0582528	0.0582528	0.0582528	0.0873735
Total harm per g							264.916
The total harm/g goes down by:								0.313335
Scenario #12: we'll improve the yield of step 6 without changing the harm
Step#	1	2	3	4	5	6	Total
Mass of SM, g	100	60	100	60	36	21.6
Yield, %	0.6	0.6	0.6	0.6	0.6	0.9
Mass of product, g	60	36	60	36	21.6	19.44
Harm per g	35	5	3	5	8.33333	13.888
Total harm	3500	300	300	300	300	299.981	4999.98
% of total harm	0.700003	0.0600002	0.0600002	0.0600002	0.0600002	0.0599964
Total harm per g							257.201
The total harm/g goes down by:								0.333333

## Sheet: Table 3
A 5-STEP SEQUENCE OF IDENTICAL STEPS
Consider the base case: A 5 step process where all steps are identical. The first step causes the most harm because it has the highest scale.
The results of the calculations are independent of the initial mass of A, but let's use 100 g of A as a starting point.
Here I'm assuming that the harm in each step is proportional to the mass of SM of that step.
For simplicity, I assume that all chemicals have the same MW.
Step#	1	2	3	4	5	Total
Mass of SM, g	100	60	36	21.6	12.96
Yield, %	0.6	0.6	0.6	0.6	0.6
Mass of product, g	60	36	21.6	12.96	7.776
Harm per g	1	1	1	1	1
Total harm	100	60	36	21.6	12.96	230.56
% of total harm	0.433727	0.260236	0.156142	0.0936849	0.056211
Total harm per g						29.6502
Now let's revise this scenario and see what happens.			l
Scenario #1: we'll make step 1 greener
Step#	1	2	3	4	5	Total
Mass of SM, g	100	60	36	21.6	12.96
Yield, %	0.6	0.6	0.6	0.6	0.6
Mass of product, g	60	36	21.6	12.96	7.776
Harm per g	0.5	1	1	1	1
Total harm	50	60	36	21.6	12.96	180.56
% of total harm	0.276916	0.3323	0.19938	0.119628	0.0717767
Total harm per g						23.2202
The total harm/g goes down by:							0.216863
Scenario #2: we'll make step 2 greener
Step#	1	2	3	4	5	Total
Mass of SM, g	100	60	36	21.6	12.96
Yield, %	0.6	0.6	0.6	0.6	0.6
Mass of product, g	60	36	21.6	12.96	7.776
Harm per g	1	0.5	1	1	1
Total harm	100	30	36	21.6	12.96	200.56
% of total harm	0.498604	0.149581	0.179497	0.107698	0.0646191
Total harm per g						25.7922
The total harm/g goes down by:							0.130118
Scenario #3: we'll make step 3 greener
Step#	1	2	3	4	5	Total
Mass of SM, g	100	60	36	21.6	12.96
Yield, %	0.6	0.6	0.6	0.6	0.6
Mass of product, g	60	36	21.6	12.96	7.776
Harm per g	1	1	0.5	1	1
Total harm	100	60	18	21.6	12.96	212.56
% of total harm	0.470455	0.282273	0.084682	0.101618	0.060971
Total harm per g						27.3354
The total harm/g goes down by:							0.0780708
Scenario #4: we'll make step 4 greener
Step#	1	2	3	4	5	Total
Mass of SM, g	100	60	36	21.6	12.96
Yield, %	0.6	0.6	0.6	0.6	0.6
Mass of product, g	60	36	21.6	12.96	7.776
Harm per g	1	1	1	0.5	1
Total harm	100	60	36	10.8	12.96	219.76
% of total harm	0.455042	0.273025	0.163815	0.0491445	0.0589734
Total harm per g						28.2613
The total harm/g goes down by:							0.0468425
Scenario #5: we'll make step 5 greener
Step#	1	2	3	4	5	Total
Mass of SM, g	100	60	36	21.6	12.96
Yield, %	0.6	0.6	0.6	0.6	0.6
Mass of product, g	60	36	21.6	12.96	7.776
Harm per g	1	1	1	1	0.5
Total harm	100	60	36	21.6	6.48	224.08
% of total harm	0.446269	0.267762	0.160657	0.0963941	0.0289182
Total harm per g						28.8169
The total harm/g goes down by:							0.0281055
Scenario #6: we'll improve the yield of step 1 without changing the harm
Step#	1	2	3	4	5	Total
Mass of SM, g	100	90	54	32.4	19.44
Yield, %	0.9	0.6	0.6	0.6	0.6
Mass of product, g	90	54	32.4	19.44	11.664
Harm per g	1	1	1	1	1
Total harm	100	90	54	32.4	19.44	295.84
% of total harm	0.338021	0.304218	0.182531	0.109519	0.0657112
Total harm per g						25.3635
The total harm/g goes down by:							0.144576
Scenario #7: we'll improve the yield of step 2 without changing the harm
Step#	1	2	3	4	5	Total
Mass of SM, g	100	60	54	32.4	19.44
Yield, %	0.6	0.9	0.6	0.6	0.6
Mass of product, g	60	54	32.4	19.44	11.664
Harm per g	1	1	1	1	1
Total harm	100	60	54	32.4	19.44	265.84
% of total harm	0.376166	0.2257	0.20313	0.121878	0.0731267
Total harm per g						22.7915
The total harm/g goes down by:							0.231321
Scenario #8: we'll improve the yield of step 3 without changing the harm
Step#	1	2	3	4	5	Total
Mass of SM, g	100	60	36	32.4	19.44
Yield, %	0.6	0.6	0.9	0.6	0.6
Mass of product, g	60	36	32.4	19.44	11.664
Harm per g	1	1	1	1	1
Total harm	100	60	36	32.4	19.44	247.84
% of total harm	0.403486	0.242092	0.145255	0.13073	0.0784377
Total harm per g						21.2483
The total harm/g goes down by:							0.283368
Scenario #9: we'll improve the yield of step 4 without changing the harm
Step#	1	2	3	4	5	Total
Mass of SM, g	100	60	36	21.6	19.44
Yield, %	0.6	0.6	0.6	0.9	0.6
Mass of product, g	60	36	21.6	19.44	11.664
Harm per g	1	1	1	1	1
Total harm	100	60	36	21.6	19.44	237.04
% of total harm	0.42187	0.253122	0.151873	0.0911239	0.0820115
Total harm per g						20.3224
The total harm/g goes down by:							0.314596
Scenario #10: we'll improve the yield of step 5 without changing the harm
Step#	1	2	3	4	5	Total
Mass of SM, g	100	60	36	21.6	12.96
Yield, %	0.6	0.6	0.6	0.6	0.9
Mass of product, g	60	36	21.6	12.96	11.664
Harm per g	1	1	1	1	1
Total harm	100	60	36	21.6	12.96	230.56
% of total harm	0.433727	0.260236	0.156142	0.0936849	0.056211
Total harm per g						19.7668
The total harm/g goes down by:							0.333333

## Sheet: Table 4
A 5-STEP SEQUENCE WITH NO HOTSPOTS
Consider the base case: A 5 step process where there is no direct hotspot.
The results of the calculations are independent of the initial mass of A, but let's use 100 g of A as a starting point.
Here I'm assuming that the harm in each step is proportional to the mass of SM of that step.
For simplicity, I assume that all chemicals have the same MW.
Step#	1	2	3	4	5	Total
Mass of SM, g	100	60	36	21.6	12.96
Yield, %	0.6	0.6	0.6	0.6	0.6
Mass of product, g	60	36	21.6	12.96	7.776
Harm per g	3	5	8.33333	13.8889	23.1481
Total harm	300	300	300	300	300	1500
% of total harm	0.2	0.2	0.2	0.2	0.2
Total harm per g						192.901
Now let's revise this scenario and see what happens.
Scenario #1: we'll make step 1 greener
Step#	1	2	3	4	5	Total
Mass of SM, g	100	60	36	21.6	12.96
Yield, %	0.6	0.6	0.6	0.6	0.6
Mass of product, g	60	36	21.6	12.96	7.776
Harm per g	1.5	5	8.33333	13.8889	23.1481
Total harm	150	300	300	300	300	1350
% of total harm	0.111111	0.222222	0.222222	0.222222	0.222222
Total harm per g						173.611
The total harm/g goes down by:							0.1
Scenario #2: we'll make step 2 greener
Step#	1	2	3	4	5	Total
Mass of SM, g	100	60	36	21.6	12.96
Yield, %	0.6	0.6	0.6	0.6	0.6
Mass of product, g	60	36	21.6	12.96	7.776
Harm per g	3	2.5	8.33333	13.8889	23.1481
Total harm	300	150	300	300	300	1350
% of total harm	0.222222	0.111111	0.222222	0.222222	0.222222
Total harm per g						173.611
The total harm/g goes down by:							0.1
Scenario #3: we'll make step 3 greener
Step#	1	2	3	4	5	Total
Mass of SM, g	100	60	36	21.6	12.96
Yield, %	0.6	0.6	0.6	0.6	0.6
Mass of product, g	60	36	21.6	12.96	7.776
Harm per g	3	5	4.16667	13.8889	23.1481
Total harm	300	300	150	300	300	1350
% of total harm	0.222222	0.222222	0.111111	0.222222	0.222222
Total harm per g						173.611
The total harm/g goes down by:							0.1
Scenario #4: we'll make step 4 greener
Step#	1	2	3	4	5	Total
Mass of SM, g	100	60	36	21.6	12.96
Yield, %	0.6	0.6	0.6	0.6	0.6
Mass of product, g	60	36	21.6	12.96	7.776
Harm per g	3	5	8.33333	6.94444	23.1481
Total harm	300	300	300	150	300	1350
% of total harm	0.222222	0.222222	0.222222	0.111111	0.222222
Total harm per g						173.611
The total harm/g goes down by:							0.1
Scenario #5: we'll make step 5 greener
Step#	1	2	3	4	5	Total
Mass of SM, g	100	60	36	21.6	12.96
Yield, %	0.6	0.6	0.6	0.6	0.6
Mass of product, g	60	36	21.6	12.96	7.776
Harm per g	3	5	8.33333	13.8889	11.5741
Total harm	300	300	300	300	150	1350
% of total harm	0.222222	0.222222	0.222222	0.222222	0.111111
Total harm per g						173.611
The total harm/g goes down by:							0.1
Scenario #6: we'll improve the yield of step 1 without changing the harm
Step#	1	2	3	4	5	Total
Mass of SM, g	100	90	54	32.4	19.44
Yield, %	0.9	0.6	0.6	0.6	0.6
Mass of product, g	90	54	32.4	19.44	11.664
Harm per g	3	5	8.33333	13.8889	23.1481
Total harm	300	450	450	450	450	2100
% of total harm	0.142857	0.214286	0.214286	0.214286	0.214286
Total harm per g						180.041
The total harm/g goes down by:							0.0666667
Scenario #7: we'll improve the yield of step 2 without changing the harm
Step#	1	2	3	4	5	Total
Mass of SM, g	100	60	54	32.4	19.44
Yield, %	0.6	0.9	0.6	0.6	0.6
Mass of product, g	60	54	32.4	19.44	11.664
Harm per g	3	5	8.33333	13.8889	23.1481
Total harm	300	300	450	450	450	1950
% of total harm	0.153846	0.153846	0.230769	0.230769	0.230769
Total harm per g						167.181
The total harm/g goes down by:							0.133333
Scenario #8: we'll improve the yield of step 3 without changing the harm
Step#	1	2	3	4	5	Total
Mass of SM, g	100	60	36	32.4	19.44
Yield, %	0.6	0.6	0.9	0.6	0.6
Mass of product, g	60	36	32.4	19.44	11.664
Harm per g	3	5	8.33333	13.8889	23.1481
Total harm	300	300	300	450	450	1800
% of total harm	0.166667	0.166667	0.166667	0.25	0.25
Total harm per g						154.321
The total harm/g goes down by:							0.2
Scenario #9: we'll improve the yield of step 4 without changing the harm
Step#	1	2	3	4	5	Total
Mass of SM, g	100	60	36	21.6	19.44
Yield, %	0.6	0.6	0.6	0.9	0.6
Mass of product, g	60	36	21.6	19.44	11.664
Harm per g	3	5	8.33333	13.8889	23.1481
Total harm	300	300	300	300	450	1650
% of total harm	0.181818	0.181818	0.181818	0.181818	0.272727
Total harm per g						141.461
The total harm/g goes down by:							0.266667
Scenario #10: we'll improve the yield of step 5 without changing the harm
Step#	1	2	3	4	5	Total
Mass of SM, g	100	60	36	21.6	12.96
Yield, %	0.6	0.6	0.6	0.6	0.9
Mass of product, g	60	36	21.6	12.96	11.664
Harm per g	3	5	8.33333	13.8889	23.1481
Total harm	300	300	300	300	300	1500
% of total harm	0.2	0.2	0.2	0.2	0.2
Total harm per g						128.601
The total harm/g goes down by:							0.333333

## Sheet: Table 5
A 5-STEP SEQUENCE WITH TWO DIRECT HOTSPOTS
Consider the base case: A 5 step process where the 2nd and 4th steps are equal direct hotspots.
The results of the calculations are independent of the initial mass of A, but let's use 100 g of A as a starting point.
Here I'm assuming that the harm in each step is proportional to the mass of SM of that step.
For simplicity, I assume that all chemicals have the same MW.
Step#	1	2	3	4	5	Total
Mass of SM, g	100	60	36	21.6	12.96
Yield, %	0.6	0.6	0.6	0.6	0.6
Mass of product, g	60	36	21.6	12.96	7.776
Harm per g	3	54.9828	8.33333	152.577	23.1481
Total harm	300	3298.97	300	3295.67	300	7494.64
% of total harm	0.0400286	0.440177	0.0400286	0.439737	0.0400286
Total harm per g						963.817
Now let's revise this scenario and see what happens.
Scenario #1: we'll make step 1 greener
Step#	1	2	3	4	5	Total
Mass of SM, g	100	60	36	21.6	12.96
Yield, %	0.6	0.6	0.6	0.6	0.6
Mass of product, g	60	36	21.6	12.96	7.776
Harm per g	1.5	54.9828	8.33333	152.577	23.1481
Total harm	150	3298.97	300	3295.67	300	7344.64
% of total harm	0.0204231	0.449167	0.0408461	0.448718	0.0408461
Total harm per g						944.527
The total harm/g goes down by:							0.0200143
Scenario #2: we'll make step 2 greener
Step#	1	2	3	4	5	Total
Mass of SM, g	100	60	36	21.6	12.96
Yield, %	0.6	0.6	0.6	0.6	0.6
Mass of product, g	60	36	21.6	12.96	7.776
Harm per g	3	27.4914	8.33333	152.577	23.1481
Total harm	300	1649.48	300	3295.67	300	5845.15
% of total harm	0.0513246	0.282197	0.0513246	0.563829	0.0513246
Total harm per g						751.692
The total harm/g goes down by:							0.220089
Scenario #3: we'll make step 3 greener
Step#	1	2	3	4	5	Total
Mass of SM, g	100	60	36	21.6	12.96
Yield, %	0.6	0.6	0.6	0.6	0.6
Mass of product, g	60	36	21.6	12.96	7.776
Harm per g	3	54.9828	4.16667	152.577	23.1481
Total harm	300	3298.97	150	3295.67	300	7344.64
% of total harm	0.0408461	0.449167	0.0204231	0.448718	0.0408461
Total harm per g						944.527
The total harm/g goes down by:							0.0200143
Scenario #4: we'll make step 4 greener
Step#	1	2	3	4	5	Total
Mass of SM, g	100	60	36	21.6	12.96
Yield, %	0.6	0.6	0.6	0.6	0.6
Mass of product, g	60	36	21.6	12.96	7.776
Harm per g	3	54.9828	8.33333	76.2887	23.1481
Total harm	300	3298.97	300	1647.84	300	5846.8
% of total harm	0.0513101	0.564235	0.0513101	0.281835	0.0513101
Total harm per g						751.904
The total harm/g goes down by:							0.219868
Scenario #5: we'll make step 5 greener
Step#	1	2	3	4	5	Total
Mass of SM, g	100	60	36	21.6	12.96
Yield, %	0.6	0.6	0.6	0.6	0.6
Mass of product, g	60	36	21.6	12.96	7.776
Harm per g	3	54.9828	8.33333	152.577	11.5741
Total harm	300	3298.97	300	3295.67	150	7344.64
% of total harm	0.0408461	0.449167	0.0408461	0.448718	0.0204231
Total harm per g						944.527
The total harm/g goes down by:							0.0200143
Scenario #6: we'll improve the yield of step 1 without changing the harm
Step#	1	2	3	4	5	Total
Mass of SM, g	100	90	54	32.4	19.44
Yield, %	0.9	0.6	0.6	0.6	0.6
Mass of product, g	90	54	32.4	19.44	11.664
Harm per g	3	54.9828	8.33333	152.577	23.1481
Total harm	300	4948.45	450	4943.51	450	11092
% of total harm	0.0270466	0.44613	0.0405699	0.445684	0.0405699
Total harm per g						950.957
The total harm/g goes down by:							0.0133429
Scenario #7: we'll improve the yield of step 2 without changing the harm
Step#	1	2	3	4	5	Total
Mass of SM, g	100	60	54	32.4	19.44
Yield, %	0.6	0.9	0.6	0.6	0.6
Mass of product, g	60	54	32.4	19.44	11.664
Harm per g	3	54.9828	8.33333	152.577	23.1481
Total harm	300	3298.97	450	4943.51	450	9442.47
% of total harm	0.0317713	0.349375	0.047657	0.523539	0.047657
Total harm per g						809.54
The total harm/g goes down by:							0.160069
Scenario #8: we'll improve the yield of step 3 without changing the harm
Step#	1	2	3	4	5	Total
Mass of SM, g	100	60	36	32.4	19.44
Yield, %	0.6	0.6	0.9	0.6	0.6
Mass of product, g	60	36	32.4	19.44	11.664
Harm per g	3	54.9828	8.33333	152.577	23.1481
Total harm	300	3298.97	300	4943.51	450	9292.47
% of total harm	0.0322842	0.355015	0.0322842	0.53199	0.0484263
Total harm per g						796.68
The total harm/g goes down by:							0.173411
Scenario #9: we'll improve the yield of step 4 without changing the harm
Step#	1	2	3	4	5	Total
Mass of SM, g	100	60	36	21.6	19.44
Yield, %	0.6	0.6	0.6	0.9	0.6
Mass of product, g	60	36	21.6	19.44	11.664
Harm per g	3	54.9828	8.33333	152.577	23.1481
Total harm	300	3298.97	300	3295.67	450	7644.64
% of total harm	0.0392432	0.43154	0.0392432	0.431109	0.0588648
Total harm per g						655.405
The total harm/g goes down by:							0.31999
Scenario #10: we'll improve the yield of step 5 without changing the harm
Step#	1	2	3	4	5	Total
Mass of SM, g	100	60	36	21.6	12.96
Yield, %	0.6	0.6	0.6	0.6	0.9
Mass of product, g	60	36	21.6	12.96	11.664
Harm per g	3	54.9828	8.33333	152.577	23.1481
Total harm	300	3298.97	300	3295.67	300	7494.64
% of total harm	0.0400286	0.440177	0.0400286	0.439737	0.0400286
Total harm per g						642.545
The total harm/g goes down by:							0.333333

## Sheet: Table 6
A 5-STEP SEQUENCE WITH TWO DIFFERENT HOTSPOTS
Consider the base case: A 5 step process where the 2nd and 4th steps are hotspots for different impacts.
The results of the calculations are independent of the initial mass of A, but let's use 100 g of A as a starting point.
Here I'm assuming that the harm in each step is proportional to the mass of SM of that step.
For simplicity, I assume that all chemicals have the same MW.
Step#	1	2	3	4	5	Total
Mass of SM, g	100	60	36	21.6	12.96
Yield, %	0.6	0.6	0.6	0.6	0.6
Mass of product, g	60	36	21.6	12.96	7.776
GW per g	3	80	8.33333	13.8889	23.1481
Total GW	300	4800	300	300	300	6000
% of total GW	0.05	0.8	0.05	0.05	0.05
Total GW per g						771.605
ET per g	3	5	8.33333	222	23.1481
Total ET	300	300	300	4795.2	300	5995.2
% of total ET	0.05004	0.05004	0.05004	0.79984	0.05004
Total ET per g						770.988
Now let's revise this scenario and see what happens.
Scenario #1: we'll make step 1 greener
Step#	1	2	3	4	5	Total
Mass of SM, g	100	60	36	21.6	12.96
Yield, %	0.6	0.6	0.6	0.6	0.6
Mass of product, g	60	36	21.6	12.96	7.776
GW per g	1.5	80	8.33333	13.8889	23.1481
Total GW	150	4800	300	300	300	5850
% of total GW	0.025641	0.820513	0.0512821	0.0512821	0.0512821
Total GW per g						752.315
ET per g	1.5	5	8.33333	222	23.1481
Total ET	150	300	300	4795.2	300	5845.2
% of total ET	0.0256621	0.0513242	0.0513242	0.820365	0.0513242
Total ET per g						751.698
The total GW/g goes down by:							0.025
The total ET/g goes down by:							0.02502
Scenario #2: we'll make step 2 greener
Step#	1	2	3	4	5	Total
Mass of SM, g	100	60	36	21.6	12.96
Yield, %	0.6	0.6	0.6	0.6	0.6
Mass of product, g	60	36	21.6	12.96	7.776
GW per g	3	40	8.33333	13.8889	23.1481
Total GW	300	2400	300	300	300	3600
% of total GW	0.0833333	0.666667	0.0833333	0.0833333	0.0833333
Total GW per g						462.963
ET per g	3	2.5	8.33333	222	23.1481
Total ET	300	150	300	4795.2	300	5845.2
% of total ET	0.0513242	0.0256621	0.0513242	0.820365	0.0513242
Total ET per g						751.698
The total GW/g goes down by:							0.4
The total ET/g goes down by:							0.02502
Scenario #3: we'll make step 3 greener
Step#	1	2	3	4	5	Total
Mass of SM, g	100	60	36	21.6	12.96
Yield, %	0.6	0.6	0.6	0.6	0.6
Mass of product, g	60	36	21.6	12.96	7.776
GW per g	3	80	4.16667	13.8889	23.1481
Total GW	300	4800	150	300	300	5850
% of total GW	0.0512821	0.820513	0.025641	0.0512821	0.0512821
Total GW per g						752.315
ET per g	3	5	4.16667	222	23.1481
Total ET	300	300	150	4795.2	300	5845.2
% of total ET	0.0513242	0.0513242	0.0256621	0.820365	0.0513242
Total ET per g						751.698
The total GW/g goes down by:							0.025
The total ET/g goes down by:							0.02502
Scenario #4: we'll make step 4 greener
Step#	1	2	3	4	5	Total
Mass of SM, g	100	60	36	21.6	12.96
Yield, %	0.6	0.6	0.6	0.6	0.6
Mass of product, g	60	36	21.6	12.96	7.776
GW per g	3	80	8.33333	6.94444	23.1481
Total GW	300	4800	300	150	300	5850
% of total GW	0.0512821	0.820513	0.0512821	0.025641	0.0512821
Total GW per g						752.315
ET per g	3	5	8.33333	111	23.1481
Total ET	300	300	300	2397.6	300	3597.6
% of total ET	0.0833889	0.0833889	0.0833889	0.666444	0.0833889
Total ET per g						462.654
The total GW/g goes down by:							0.025
The total ET/g goes down by:							0.39992
Scenario #5: we'll make step 5 greener
Step#	1	2	3	4	5	Total
Mass of SM, g	100	60	36	21.6	12.96
Yield, %	0.6	0.6	0.6	0.6	0.6
Mass of product, g	60	36	21.6	12.96	7.776
GW per g	3	80	8.33333	13.8889	11.5741
Total GW	300	4800	300	300	150	5850
% of total GW	0.0512821	0.820513	0.0512821	0.0512821	0.025641
Total GW per g						752.315
ET per g	3	5	8.33333	222	11.5741
Total ET	300	300	300	4795.2	150	5845.2
% of total ET	0.0513242	0.0513242	0.0513242	0.820365	0.0256621
Total ET per g						751.698
The total GW/g goes down by:							0.025
The total ET/g goes down by:							0.02502
Scenario #6: we'll improve the yield of step 1 without changing the harm
Step#	1	2	3	4	5	Total
Mass of SM, g	100	90	54	32.4	19.44
Yield, %	0.9	0.6	0.6	0.6	0.6
Mass of product, g	90	54	32.4	19.44	11.664
GW per g	3	80	8.33333	13.8889	23.1481
Total GW	300	7200	450	450	450	8850
% of total GW	0.0338983	0.813559	0.0508475	0.0508475	0.0508475
Total GW per g						758.745
ET per g	3	5	8.33333	222	23.1481
Total ET	300	450	450	7192.8	450	8842.8
% of total ET	0.0339259	0.0508889	0.0508889	0.813408	0.0508889
Total ET per g						758.128
The total GW/g goes down by:							0.0166667
The total ET/g goes down by:							0.01668
Scenario #7: we'll improve the yield of step 2 without changing the harm
Step#	1	2	3	4	5	Total
Mass of SM, g	100	60	54	32.4	19.44
Yield, %	0.6	0.9	0.6	0.6	0.6
Mass of product, g	60	54	32.4	19.44	11.664
GW per g	3	80	8.33333	13.8889	23.1481
Total GW	300	4800	450	450	450	6450
% of total GW	0.0465116	0.744186	0.0697674	0.0697674	0.0697674
Total GW per g						552.984
ET per g	3	5	8.33333	222	23.1481
Total ET	300	300	450	7192.8	450	8692.8
% of total ET	0.0345113	0.0345113	0.051767	0.827443	0.051767
Total ET per g						745.267
The total GW/g goes down by:							0.283333
The total ET/g goes down by:							0.03336
Scenario #8: we'll improve the yield of step 3 without changing the harm
Step#	1	2	3	4	5	Total
Mass of SM, g	100	60	36	32.4	19.44
Yield, %	0.6	0.6	0.9	0.6	0.6
Mass of product, g	60	36	32.4	19.44	11.664
GW per g	3	80	8.33333	13.8889	23.1481
Total GW	300	4800	300	450	450	6300
% of total GW	0.047619	0.761905	0.047619	0.0714286	0.0714286
Total GW per g						540.123
ET per g	3	5	8.33333	222	23.1481
Total ET	300	300	300	7192.8	450	8542.8
% of total ET	0.0351173	0.0351173	0.0351173	0.841972	0.0526759
Total ET per g						732.407
The total GW/g goes down by:							0.3
The total ET/g goes down by:							0.05004
Scenario #9: we'll improve the yield of step 4 without changing the harm
Step#	1	2	3	4	5	Total
Mass of SM, g	100	60	36	21.6	19.44
Yield, %	0.6	0.6	0.6	0.9	0.6
Mass of product, g	60	36	21.6	19.44	11.664
GW per g	3	80	8.33333	13.8889	23.1481
Total GW	300	4800	300	300	450	6150
% of total GW	0.0487805	0.780488	0.0487805	0.0487805	0.0731707
Total GW per g						527.263
ET per g	3	5	8.33333	222	23.1481
Total ET	300	300	300	4795.2	450	6145.2
% of total ET	0.0488186	0.0488186	0.0488186	0.780316	0.0732279
Total ET per g						526.852
The total GW/g goes down by:							0.316667
The total ET/g goes down by:							0.316653
Scenario #10: we'll improve the yield of step 5 without changing the harm
Step#	1	2	3	4	5	Total
Mass of SM, g	100	60	36	21.6	12.96
Yield, %	0.6	0.6	0.6	0.6	0.9
Mass of product, g	60	36	21.6	12.96	11.664
GW per g	3	80	8.33333	13.8889	23.1481
Total GW	300	4800	300	300	300	6000
% of total GW	0.05	0.8	0.05	0.05	0.05
Total GW per g						514.403
ET per g	3	5	8.33333	222	23.1481
Total ET	300	300	300	4795.2	300	5995.2
% of total ET	0.05004	0.05004	0.05004	0.79984	0.05004
Total ET per g						513.992
The total GW/g goes down by:							0.333333
The total ET/g goes down by:							0.333333

## Sheet: Table 7
A 2-STEP SEQUENCE WITH A PURIFICATION STEP THAT IS A DIRECT HOTSPOT
Consider the base case: A two step process where the 2nd step is the hotspot and is a purification step rather than a reaction step.
The results of the calculations are independent of the initial mass of A, but let's use 100 g of A as a starting point.
Here I'm assuming that the harm in each step is proportional to the mass of SM of that step.
For simplicity, I assume that all chemicals have the same MW.
Step#	1	2	Total
Mass of SM, g	100	60
Yield, %	0.6	0.6
Mass of product, g	60	36
Harm per g	3	20
Total harm	300	1200	1500
% of total harm	0.2	0.8
Total harm per g			41.6667
Now let's revise this scenario and see what happens.
Scenario #1: we'll make step 1 greener
Step#	1	2	Total
Mass of SM, g	100	60
Yield, %	0.6	0.6
Mass of product, g	60	36
Harm per g	1.5	20
Total harm	150	1200	1350
% of total harm	0.111111	0.888889
Total harm per g			37.5
The total harm/g goes down by:				0.1
Scenario #2: we'll make step 2 greener
Step#	1	2	Total
Mass of SM, g	100	60
Yield, %	0.6	0.6
Mass of product, g	60	36
Harm per g	3	10
Total harm	300	600	900
% of total harm	0.333333	0.666667
Total harm per g			25
The total harm/g goes down by:				0.4
Scenario #3: we'll give step 1 a better yield
Step#	1	2	Total
Mass of SM, g	100	90
Yield, %	0.9	0.6
Mass of product, g	90	54
Harm per g	3	20
Total harm	300	1800	2100
% of total harm	0.142857	0.857143
Total harm per g			38.8889
The total harm/g goes down by:				0.0666667
Scenario #4: we'll give step 2 a better yield
Step#	1	2	Total
Mass of SM, g	100	60
Yield, %	0.6	0.9
Mass of product, g	60	54
Harm per g	3	20
Total harm	300	1200	1500
% of total harm	0.2	0.8
Total harm per g			27.7778
The total harm/g goes down by:				0.333333
Scenario #5: we'll make step 1 more selective, so step 2 is easier and causes half as much harm
Step#	1	2	Total
Mass of SM, g	100	60
Yield, %	0.6	0.6
Mass of product, g	60	36
Harm per g	3	10
Total harm	300	600	900
% of total harm	0.333333	0.666667
Total harm per g			25
The total harm/g goes down by:				0.4
Scenario #6: we'll make step 1 more selective, so step 2 is unnecessary
Step#	1	Total
Mass of SM, g	100
Yield, %	0.6
Mass of product, g	60
Harm per g	3
Total harm	300	300
% of total harm	1
Total harm per g		5
The total harm/g goes down by:			0.88

## Sheet: Table 8
A 3-STEP SEQUENCE WITH A PURIFICATION STEP THAT IS AN INDIRECT HOTSPOT
Consider the base case: A 3 step process where the 1st step is the hotspot and the third step is a purification step.
The results of the calculations are independent of the initial mass of A, but let's use 100 g of A as a starting point.
Here I'm assuming that the harm in each step is proportional to the mass of SM of that step.
For simplicity, I assume that all chemicals have the same MW.
Step#	1	2	3	Total
Mass of SM, g	100	60	36
Yield, %	0.6	0.6	0.6
Mass of product, g	60	36	21.6
Harm per g	14.4	3	5
Total harm	1440	180	180	1800
% of total harm	0.8	0.1	0.1
Total harm per g				83.3333
Now let's revise this scenario and see what happens.
Scenario #1: we'll make step 1 greener
Step#	1	2	3	Total
Mass of SM, g	100	60	36
Yield, %	0.6	0.6	0.6
Mass of product, g	60	36	21.6
Harm per g	7.2	3	5
Total harm	720	180	180	1080
% of total harm	0.666667	0.166667	0.166667
Total harm per g				50
The total harm/g goes down by:					0.4
Scenario #2: we'll make step 2 greener
Step#	1	2	3	Total
Mass of SM, g	100	60	36
Yield, %	0.6	0.6	0.6
Mass of product, g	60	36	21.6
Harm per g	14.4	1.5	5
Total harm	1440	90	180	1710
% of total harm	0.842105	0.0526316	0.105263
Total harm per g				79.1667
The total harm/g goes down by:					0.05
Scenario #3: we'll make step 3 greener
Step#	1	2	3	Total
Mass of SM, g	100	60	36
Yield, %	0.6	0.6	0.6
Mass of product, g	60	36	21.6
Harm per g	14.4	3	2.5
Total harm	1440	180	90	1710
% of total harm	0.842105	0.105263	0.0526316
Total harm per g				79.1667
The total harm/g goes down by:					0.05
Scenario #4: we'll give step 1 a better yield
Step#	1	2	3	Total
Mass of SM, g	100	90	54
Yield, %	0.9	0.6	0.6
Mass of product, g	90	54	32.4
Harm per g	14.4	3	5
Total harm	1440	270	270	1980
% of total harm	0.727273	0.136364	0.136364
Total harm per g				61.1111
The total harm/g goes down by:					0.266667
Scenario #5: we'll give step 2 a better yield
Step#	1	2	3	Total
Mass of SM, g	100	60	54
Yield, %	0.6	0.9	0.6
Mass of product, g	60	54	32.4
Harm per g	14.4	3	5
Total harm	1440	180	270	1890
% of total harm	0.761905	0.0952381	0.142857
Total harm per g				58.3333
The total harm/g goes down by:					0.3
Scenario #6: we'll give step 3 a better yield
Step#	1	2	3	Total
Mass of SM, g	100	60	36
Yield, %	0.6	0.6	0.9
Mass of product, g	60	36	32.4
Harm per g	14.4	3	5
Total harm	1440	180	180	1800
% of total harm	0.8	0.1	0.1
Total harm per g				55.5556
The total harm/g goes down by:					0.333333
Scenario #7: we'll make step 2 more selective, so step 3 is easier and causes half as much harm
Step#	1	2	3	Total
Mass of SM, g	100	60	36
Yield, %	0.6	0.6	0.6
Mass of product, g	60	36	21.6
Harm per g	14.4	3	2.5
Total harm	1440	180	90	1710
% of total harm	0.842105	0.105263	0.0526316
Total harm per g				79.1667
The total harm/g goes down by:					0.05
Scenario #8: we'll make step 2 more selective, so step 3 is easier and gives a higher yield
Step#	1	2	3	Total
Mass of SM, g	100	60	36
Yield, %	0.6	0.6	0.9
Mass of product, g	60	36	32.4
Harm per g	14.4	3	5
Total harm	1440	180	180	1800
% of total harm	0.8	0.1	0.1
Total harm per g				55.5556
The total harm/g goes down by:					0.333333
Scenario #9: we'll make step 2 more selective, so step 3 is unnecessary
Step#	1	2	3	Total
Mass of SM, g	100	60	36
Yield, %	0.6	0.6	1
Mass of product, g	60	36	36
Harm per g	14.4	3	0
Total harm	1440	180	0	1620
% of total harm	0.888889	0.111111	0
Total harm per g				45
The total harm/g goes down by:				0.46

## Sheet: Table 9
A 3-STEP SEQUENCE WITH A PURIFICATION STEP THAT IS NOT A HOTSPOT
Consider the base case: A 3 step process where the 3rd step is the hotspot and the 2nd step is a purification step.
The results of the calculations are independent of the initial mass of A, but let's use 100 g of A as a starting point.
Here I'm assuming that the harm in each step is proportional to the mass of SM of that step.
For simplicity, I assume that all chemicals have the same MW.
Step#	1	2	3	Total
Mass of SM, g	100	60	36
Yield, %	0.6	0.6	0.6
Mass of product, g	60	36	21.6
Harm per g	3	5	66.66
Total harm	300	300	2399.76	2999.76
% of total harm	0.100008	0.100008	0.799984
Total harm per g				138.878
Now let's revise this scenario and see what happens.
Scenario #1: we'll make step 1 greener
Step#	1	2	3	Total
Mass of SM, g	100	60	36
Yield, %	0.6	0.6	0.6
Mass of product, g	60	36	21.6
Harm per g	1.5	5	66.66
Total harm	150	300	2399.76	2849.76
% of total harm	0.052636	0.105272	0.842092
Total harm per g				131.933
The total harm/g goes down by:					0.050004
Scenario #2: we'll make step 2 greener
Step#	1	2	3	Total
Mass of SM, g	100	60	36
Yield, %	0.6	0.6	0.6
Mass of product, g	60	36	21.6
Harm per g	3	2.5	66.66
Total harm	300	150	2399.76	2849.76
% of total harm	0.105272	0.052636	0.842092
Total harm per g				131.933
The total harm/g goes down by:					0.050004
Scenario #3: we'll make step 3 greener
Step#	1	2	3	Total
Mass of SM, g	100	60	36
Yield, %	0.6	0.6	0.6
Mass of product, g	60	36	21.6
Harm per g	3	5	33.33
Total harm	300	300	1199.88	1799.88
% of total harm	0.166678	0.166678	0.666644
Total harm per g				83.3278
The total harm/g goes down by:					0.399992
Scenario #4: we'll give step 1 a better yield
Step#	1	2	3	Total
Mass of SM, g	100	90	54
Yield, %	0.9	0.6	0.6
Mass of product, g	90	54	32.4
Harm per g	3	5	66.66
Total harm	300	450	3599.64	4349.64
% of total harm	0.0689712	0.103457	0.827572
Total harm per g				134.248
The total harm/g goes down by:					0.033336
Scenario #5: we'll give step 2 a better yield
Step#	1	2	3	Total
Mass of SM, g	100	60	54
Yield, %	0.6	0.9	0.6
Mass of product, g	60	54	32.4
Harm per g	3	5	66.66
Total harm	300	300	3599.64	4199.64
% of total harm	0.0714347	0.0714347	0.857131
Total harm per g				129.619
The total harm/g goes down by:					0.066672
Scenario #6: we'll give step 3 a better yield
Step#	1	2	3	Total
Mass of SM, g	100	60	36
Yield, %	0.6	0.6	0.9
Mass of product, g	60	36	32.4
Harm per g	3	5	66.66
Total harm	300	300	2399.76	2999.76
% of total harm	0.100008	0.100008	0.799984
Total harm per g				92.5852
The total harm/g goes down by:					0.333333
Scenario #7: we'll make step 1 more selective, so step 2 is easier and causes half as much harm
Step#	1	2	3	Total
Mass of SM, g	100	60	36
Yield, %	0.6	0.6	0.6
Mass of product, g	60	36	21.6
Harm per g	3	2.5	66.66
Total harm	300	150	2399.76	2849.76
% of total harm	0.105272	0.052636	0.842092
Total harm per g				131.933
The total harm/g goes down by:					0.050004
Scenario #8: we'll make step 1 more selective, so step 2 is easier and gives a higher yield
Step#	1	2	3	Total
Mass of SM, g	100	60	54
Yield, %	0.6	0.9	0.6
Mass of product, g	60	54	32.4
Harm per g	3	5	66.66
Total harm	300	300	3599.64	4199.64
% of total harm	0.0714347	0.0714347	0.857131
Total harm per g				129.619
The total harm/g goes down by:					0.066672
Scenario #9: we'll make step 1 more selective, so step 2 is unnecessary
Step#	1	2	3	Total
Mass of SM, g	100	60	60
Yield, %	0.6	1	0.6
Mass of product, g	60	60	36
Harm per g	3	0	66.66
Total harm	300	0	3999.6	4299.6
% of total harm	0.0697739	0	0.930226
Total harm per g				119.433
The total harm/g goes down by:				0.140011

## Sheet: Table 10
A 5-STEP SEQUENCE WITH AN EARLY MASS-BASED HOTSPOT
Consider the base case: A 5 step process where the first step is a mass-based direct hotspot
The results of the calculations are independent of the initial mass of A, but let's use 100 g of A as a starting point.
Here I'm assuming that the waste in each step is proportional to the mass of SM of that step.
For simplicity, I assume that all chemicals have the same MW.
Step#	1	2	3	4	5	Total
Mass of SM, g	100	60	36	21.6	12.96
Yield, %	0.6	0.6	0.6	0.6	0.6
Mass of product, g	60	36	21.6	12.96	7.776
g waste per g SM	10	5	8.33333	13.8889	23.1481
Total waste	1000	300	300	300	300	2200
% of total waste	0.454545	0.136364	0.136364	0.136364	0.136364
Total waste per g						282.922
E-factor	16.6667	8.33333	13.8889	23.1481	38.5802
PMI	17.6667	9.33333	14.8889	24.1481	39.5802

[truncated: 3 more sheets: Fig 3, Fig 4, Fig 5]
